# Supplementary material for: Mitochondrial defects and metabolic vulnerabilities in Lynch syndrome–associated MSH2-deficient endometrial cancer
Source: JCI Insight. 2025 Feb 18;10(6):e185946. doi: 10.1172/jci.insight.185946 (PMC11949016; doi:10.1172/jci.insight.185946)
Supplement: Supporting data values [file jciinsight-10-185946-s273.xlsx]

## Sheet: Figure 2B
Percent TOM20-Low					Percent TOM20-High
Control NL	Msh2KO NL	Msh2KO AH	Msh2KO EC		Control NL	Msh2KO NL	Msh2KO AH	Msh2KO EC
16.5086	9.24751	22.2864	30.3545		15.7278	32.8498	0.0961	0.861158
18.6766	20.3384	19.1288	22.7077		13.1313	6.83945	4.64015	1.9707
17.7621	13.4466	35.4774	30.9549		11.1481	3.46535	0.0688	3.53802
20.5848	12.7849	15.6187	20.4372		14.269	14.245	2.57525	3.89301
15.2314	23.1224	16.1213	67.0125		12.7797	5.91198	10.1313	0.308599
20.2429	15.3097	9.64778	28.8932		6.88259	14.753	6.73813	13.1639
11.6162	10.6052	18.6789	25.5925		6.90236	10.3655	0.695322	5.55271
8.35742	13.7692	7.57098	32.6913		26.3075	12.4028	9.46372	5.54132
23.321	22.3986	9.84419	17.3801		7.04797	0.352734	5.45326	10.9209
10.7439	11.5914		23.9361		28.7197	9.62672		2.00491
	41.9806					0.861141

## Sheet: Figure 3B
Percent TOM20-Low			Percent TOM20-High
Non-MMRd	MSH2-def		Non-MMRd	MSH2-def
80.5921	98.7756		19.4079	1.2244
61.4283	96.1633		38.5717	3.8367
59.865	90.6803		40.135	9.3197
55.4779	88.3809		44.5221	11.6191
56.2484	85.3183		43.7516	14.6817
55.6197	82.3148		44.3803	17.6852
45.1031	56.1274		54.8969	43.8726
43.5801	53.9144		56.4199	46.0856
33.5292	48.6874		66.4708	51.3126
36.868	42.6355		63.132	57.3645
38.419	46.7196		61.581	53.2804
36.0453	35.8043		63.9547	64.1957
42.0948	35.2145		57.9052	64.7855
39.2416	34.0544		60.7584	65.9456
40.3394	26.1485		59.6606	73.8515
33.2235	33.3614		66.7765	66.6386
31.2694			68.7306
35.0923			64.9077
29.7169			70.2831
20.3598			79.6402
25.2265			74.7735
20.3306			79.6694
12.3376			87.6624
14.6244			85.3756

## Sheet: Figure 3E
TOM20 Intensity/Cell Area
MecPK	21B	369	1386
3372	4207	2517	1862
14183	3412	4705	1167
1428	6366	1588	5290
12972	13925	654	7525
14397	3657	2399	4401
17764	5430	4409	558
13319	5846	2752	2692
6015	12319	3655	312
5643	5211	3130	5498
1559	5647	2648	2183
5878	5561	3183	4391
19177	3317	3284	279
6216	13975	2240	136
1649	2574	3543	724
20863	5577	1935	121
3661	5153	3263	5996
5853	3263	4481	2110
1137	6076	4022	2759
3625	10278	3855	328
1168	630	3486	1571
49	3896	2563	1826
11145	1089	5035	1011
11120	2318	6670	3859
967	11509	2118	16098
4669	1815	866	1630
11746	2772	1150	1999
		3880	132
		7152	3184
		5948	696
		3044	6080
		1713	2567
		2244	3658
		3131	4
		4105	1420
		925	2692
		7072	2022
		4109	4964
		1250	4486
		2922	5143
		2702	706
		2835	2626
		1961	507
		809	2277
		5391	2154
		1188	5416
		3527	2905
		2468	2338
		13451	1988
		2385	9207
		2935	1782
		805	806
		3056	6760
		1590	2344
			4145
			148
			6224
			8306
			1299
			2033
			1679
			1800
			3022
			6412
			2605
			1736
			3083

## Sheet: Figure 3F
TOM20 Intensity/Cell Area
KLE	Hec50	MFE280	RL95-2
26385	23687	4160	6598
25581	10628	5793	1240
38382	7550	3320	5597
12833	24782	1166	2688
47099	10159	3585	2382
16037	20709	15247	9672
43578	30471	4445	3030
79986	8368	11652	1153
43431	5428	1580	3166
24164	1633	1154	2404
54456	15150	16844	4602
25542	8834	7566	1785
21243	12268	685	12389
41141	9430	14068	2917
8586	38048	7654	2477
18627	28143	12210	4777
20906	6368	12634	2959
29596	18535	16665	2232
14235	8535	7044	3419
16352	10102	5328	607
32505	13084	10026	1104
20639	12236	4271
9011	10299	3031
17644	6224	9617
27859	10246	1643
11654	9707	1002
6175	14597	960
11399	6005	6397
9478	6298	2207
18779	21166	2982
23486	15595	2164
12778	15534	2310
716	8943	754
8121	29543	2366
13613	15398	332
11463	16118	1091
12242	5967	793
9353	9444
2165	15616
7275	8508
9264	15624
4019	9557
2358	31165
20576	7590
4241	5765
5121	3925
3355	2209
1974	9870
7713	4500
3317	3359
4031	5870
	1847
	3221
	908
	6638
	3916
	4786
	1897
	1949
	5783
	3980
	2619
	2806
	4551
	1538
	724
	1139
	3692
	3630
	2529
	4273
	2901
	3218
	1691
	954
	2291
	3376
	5996
	807
	1967
	2160
	1680
	485
	4792
	6258
	411

## Sheet: Figure 4B
Normalized MMP
MecPK	21B	369	1386
0.967484	0.866495	0.743145	0.785908
1.00434	0.803729	0.637222	0.710304
1.02818	0.76023	0.585918	0.53237

## Sheet: Figure 4C
Normalized MMP
KLE	HEC50	MFE280	RL95-2
0.877355	1.31977	0.791211	0.527514
1.06585	1.5069	0.584878	0.491969
1.0568	1.41473	0.605491	0.587072

## Sheet: Figure 4E
Normalized MMP
KLE-Scr	KLE-shRNA1	KLE-shRNA2
1.00426	0.813095	0.979927
0.995736	0.835288	1.02181
	0.771389	0.952809

## Sheet: Figure 4F
Normalized MMP
Hec50-Scr	Hec50-shRNA1	Hec50-shRNA2
1.01686	0.417849	0.516727
0.983137	0.397429	0.408081
	0.45563	0.433508

## Sheet: Figure 5A
Basal OCR
MecPK	21B	369	1386
96.0487	13.3066	15.6529	26.5667
95.2371	14.9127	29.001	21.5722
114.443	19.1386	24.227	33.125
92.8313	12.8588	25.1716	33.0309
85.2976	16.7163	15.5659	24.3879
79.2615	14.134	21.3297	11.157
71.204	15.8988	16.7847
62.8748	17.3121	22.8875
71.3834	14.7864	12.2892
104.701	15.4884
81.0704	11.6008
99.889	15.5713
84.9111	9.6172

## Sheet: Figure 5B
SRC
MecPK	21B	369	1386
255.117	49.9161	87.6858	125.457
350.922	54.2208	88.716	63.4944
346.646	75.667	86.1268	165.029
362.936	59.5326	93.7946	147.989
340.11	60.1388	121.002	148.068
329.585	63.1711	76.0866	83.5278
346.741	72.2898	56.4652
285.004	62.2006	78.0179
304.232	53.2699	38.5514
299.969	53.9112
276.803	39.191
318.539	36.0121
220.87	34.8457

[truncated: 11 more sheets: Figure 5C, Figure 5D, Figure 5E, Figure 5F, Figure 5G, Figure 5H, Tables 2,3,4, Figure 6B, Figure 6C, Figure 7, Figure S1]
